# Supplementary material for: Highly sensitive hydrogen peroxide biosensors based on TiO2 nanodots/ITO electrodes
Source: Royal Society of Chemistry journal article supplement (doi:10.1039/c2jm30853c), 2012-01-01
Supplement: c2jm30853c.pdf [file c2jm30853c.pdf]

## Supplementary Data

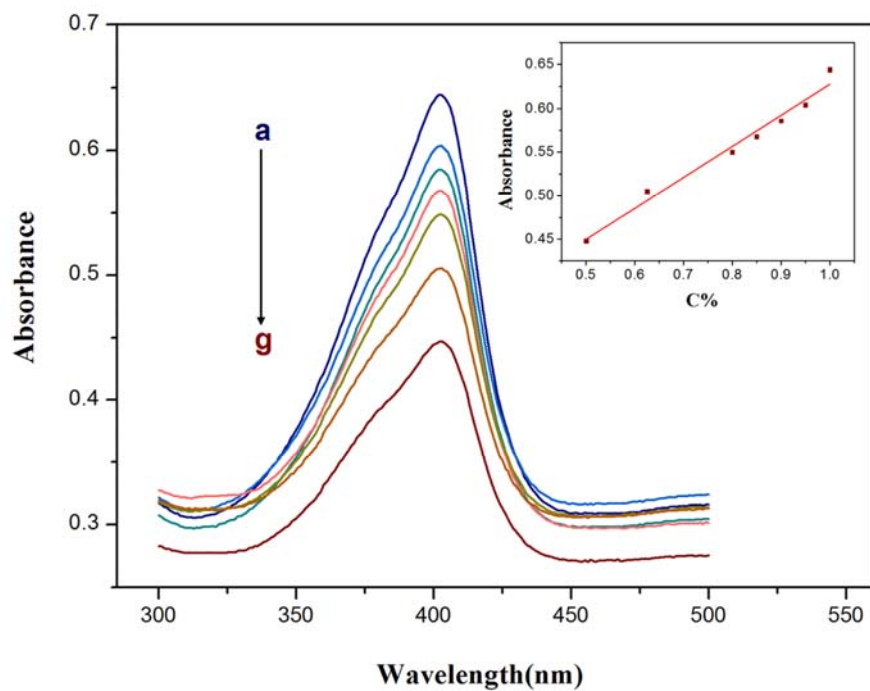

**Fig. S1** UV-vis spectra of HRP solution with different concentration: (a) 0.2, (b) 0.19, (c) 0.18, (d) 0.17, (e) 0.16, (f) 0.125 and (g) 0.1  $\text{mg mL}^{-1}$ . Inset: plot of absorption peak at 402 nm versus relative concentration of HRP.

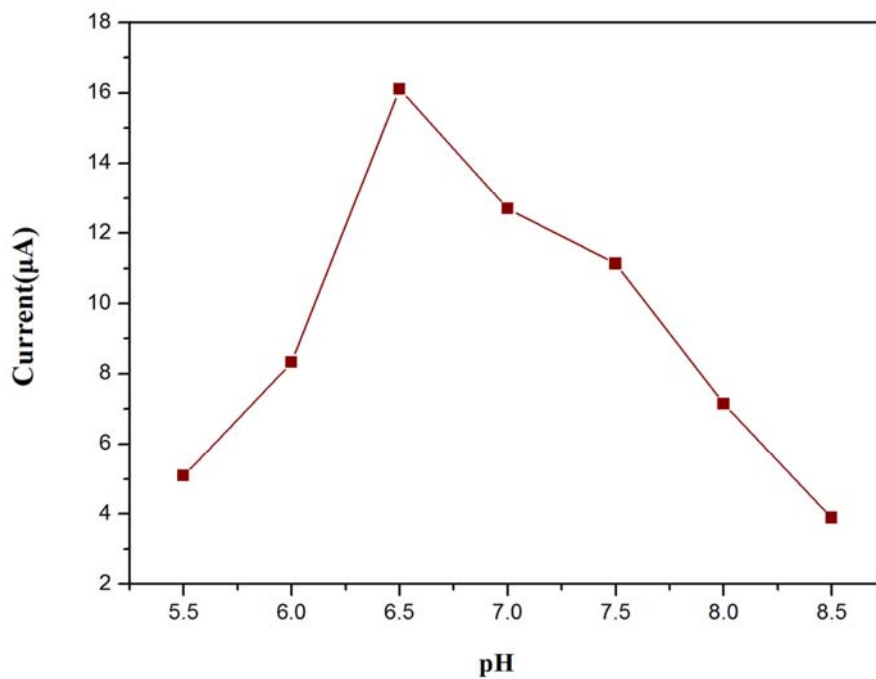

**Fig. S2** Current response of Nafion/HRP/TN-3/ITO electrode to 100  $\mu\text{M}$   $\text{H}_2\text{O}_2$  in 0.1 M PBS with different pH values at -0.95 V.

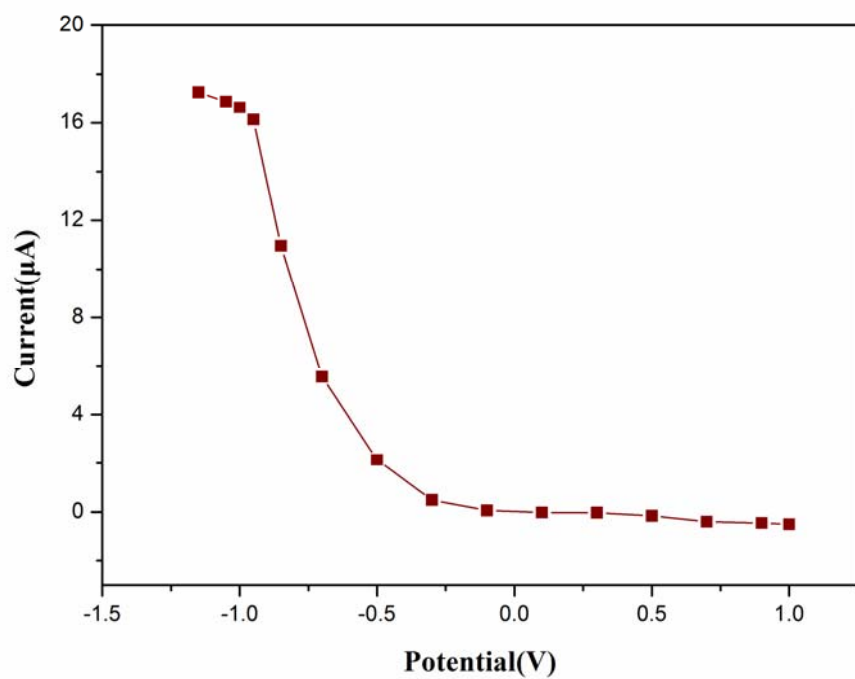

**Fig. S3** Current response of Nafion/HRP/TN-3/ITO electrode to 100 μM H<sub>2</sub>O<sub>2</sub> in 0.1 M PBS with different applied voltage.

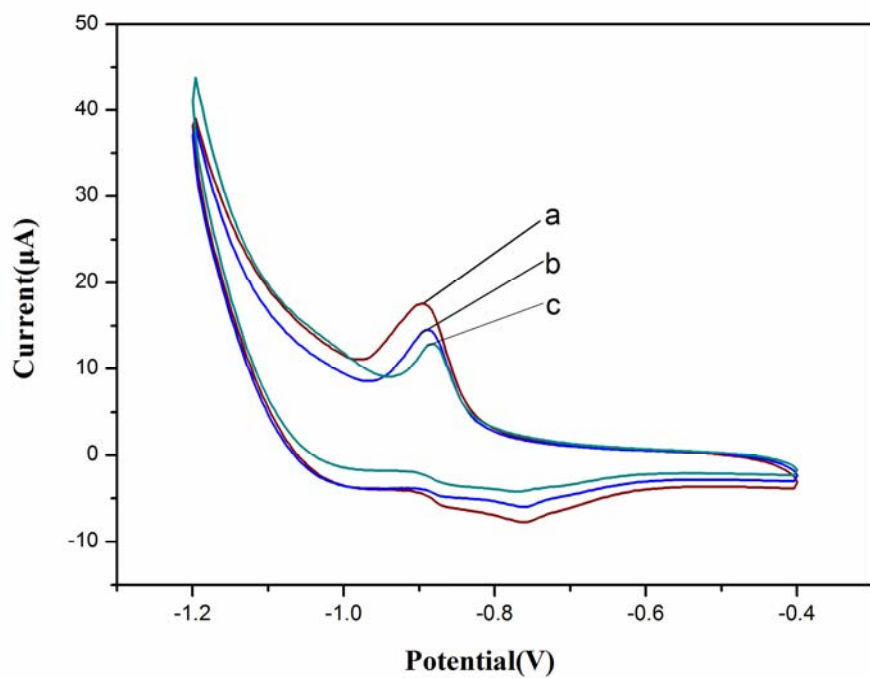

**Fig. S4** CVs of (a) Nafion/HRP/TN-3/ITO electrode, (b) Nafion/HRP/TN-2/ITO electrode and (c) Nafion/HRP/TN-1/ITO electrode in 0.1 M PBS at a scan rate of 0.1 V s<sup>-1</sup>.
